# Supplementary material for: Peripheral Blood from Rheumatoid Arthritis Patients Shows Decreased Treg CD25 Expression and Reduced Frequency of Effector Treg Subpopulation
Source: PubMed Central journal article supplement (PMC8067140; doi:10.3390/cells10040801), 2021-04-03
Supplement: cells-10-00801-s001.pdf [file cells-10-00801-s001.pdf]

**Figure S1.**

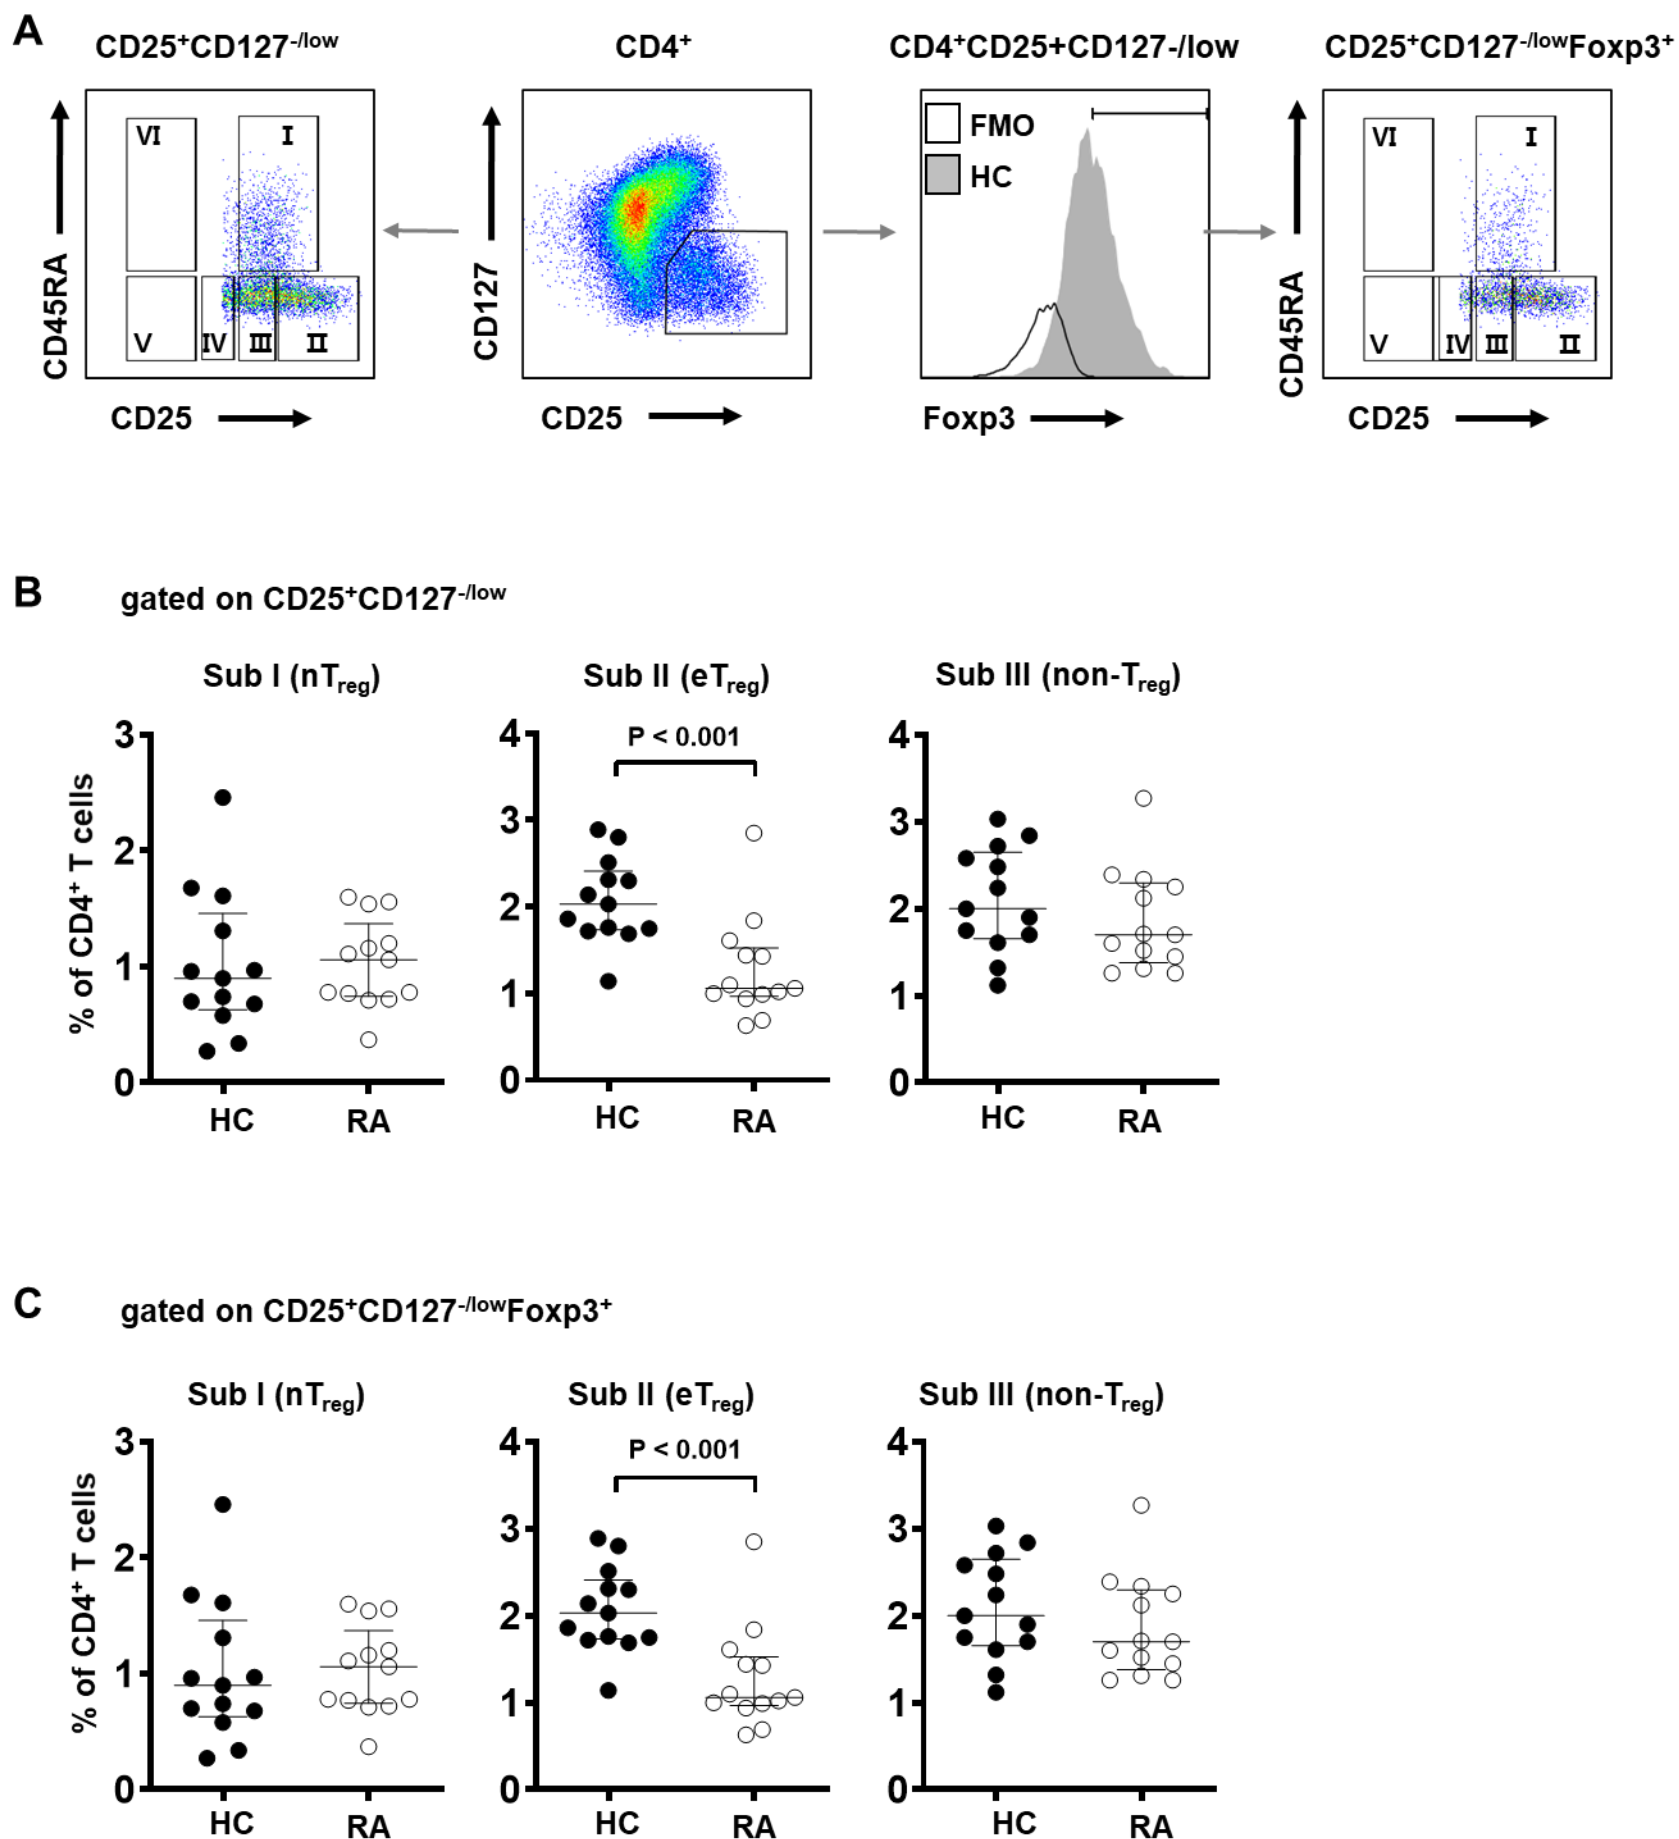

**Figure S1.** Frequency of effector  $T_{reg}$  cells among total  $T_{reg}$  cells defined as  $CD25^+CD127^{-/low}$  or  $CD25^+CD127^{-/low}Foxp3^+$  is decreased in PBMCs of RA patients. Blood samples were collected from healthy donors (HC,  $n = 13$ ) and RA patients (RA,  $n = 13$ ) and  $T_{reg}$  cell subpopulations were analyzed by flow cytometry. (A) Representative plots show the gating strategy used to identify subgroup I ( $CD25^{int}CD45RA^+$  cells), II ( $CD25^{hi}CD45RA^-$  cells), and III ( $CD25^{int}CD45RA^-$  cells) in  $CD25^+CD127^{-/low}$  or  $CD25^+CD127^{-/low}Foxp3^+$   $T_{reg}$  cells by flow cytometry. (B) Frequency of subgroup I, II, and III in  $T_{reg}$  cells defined by  $CD25^+CD127^{-/low}$ . (C) Frequency of subgroup I, II, and III in  $T_{reg}$  cells defined by  $CD25^+CD127^{-/low}Foxp3^+$ . Statistical differences were calculated by Mann-Whitney test.

Figure S2.

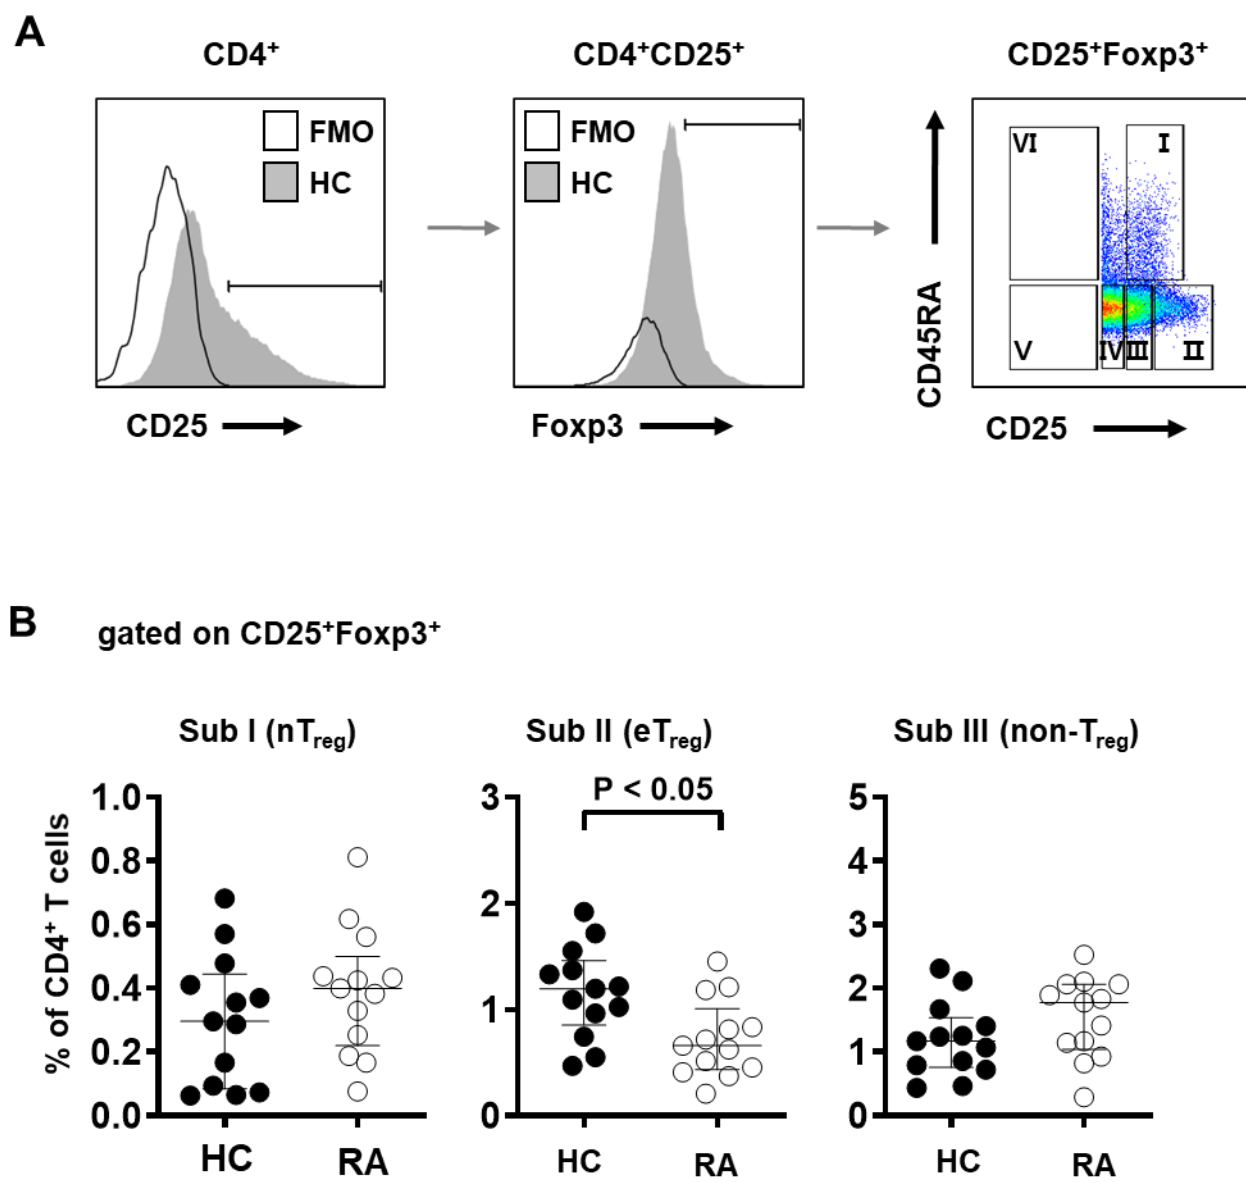

**Figure S2.** Frequency of effector T<sub>reg</sub> cells among CD25<sup>+</sup>Foxp3<sup>+</sup> T<sub>reg</sub> cells is decreased in PBMCs of RA patients. (A) Representative plots show the gating strategy used to identify subgroup I (CD25<sup>int</sup>CD45RA<sup>+</sup> cells), II (CD25<sup>hi</sup>CD45RA<sup>-</sup> cells), and III (CD25<sup>int</sup>CD45RA<sup>-</sup> cells) in CD25<sup>+</sup>Foxp3<sup>+</sup> Treg cells by flow cytometry. FMO (fluorescence minus one control); HC (healthy control). (B) Frequency of subgroup I, II, and III in CD25<sup>+</sup>Foxp3<sup>+</sup> T<sub>reg</sub> cells of PBMCs from healthy controls (HC, n = 13) and RA patients (RA, n = 13). Statistical differences were calculated by Mann-Whitney test.

**Figure S3.**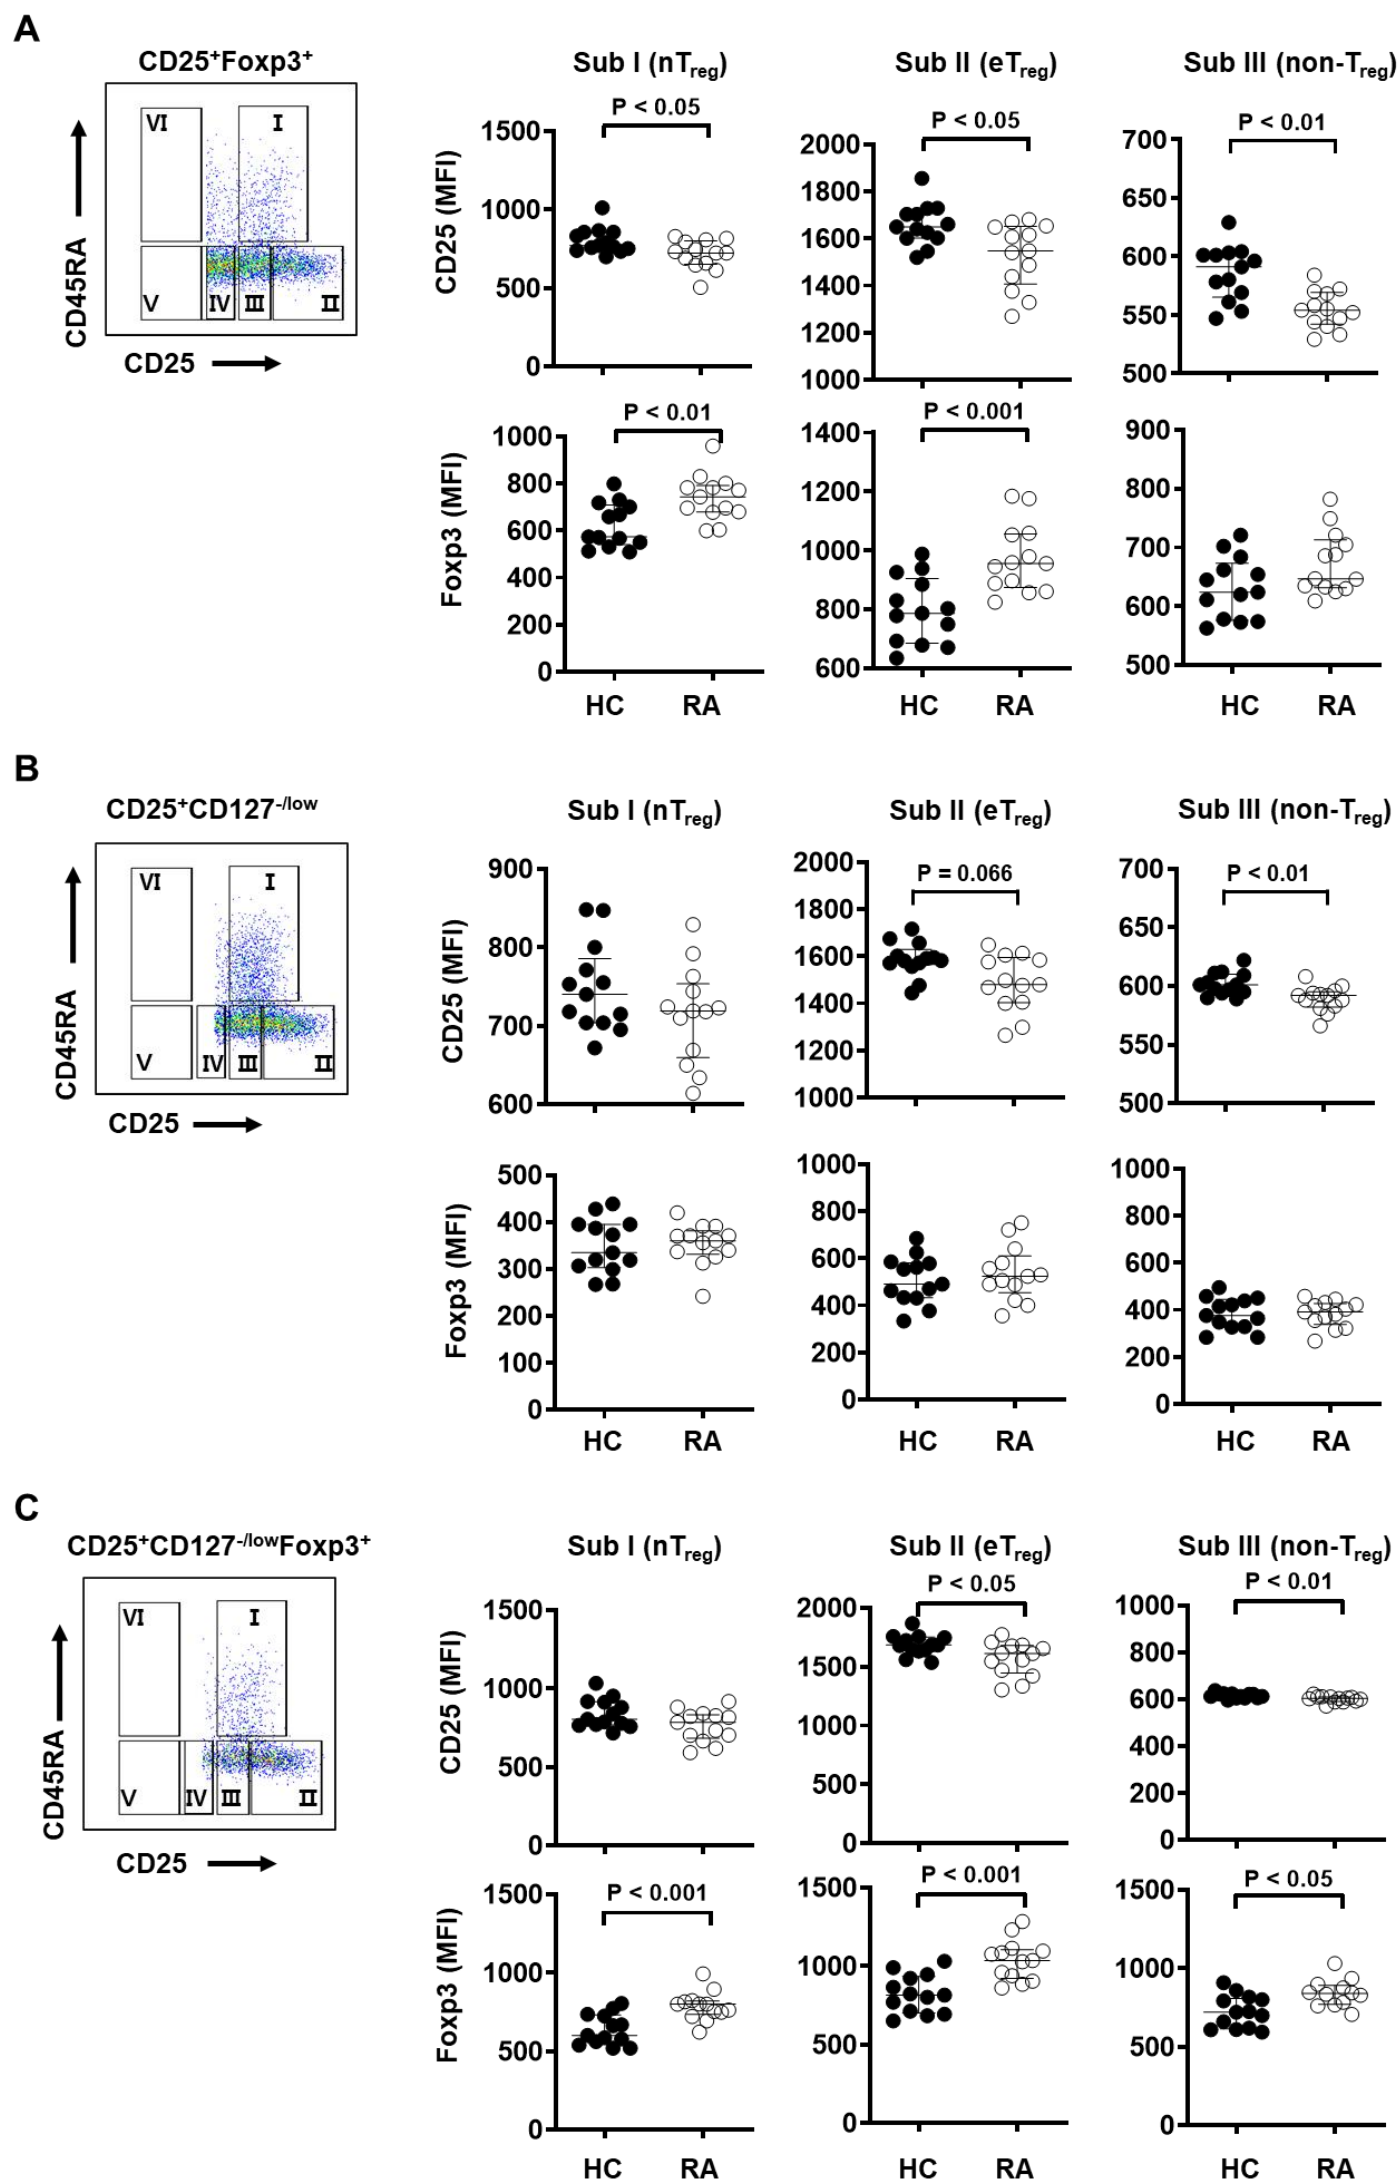

**Figure S3.** Naïve and effector T<sub>reg</sub> cells from RA patients show decreased CD25 expression. Expression of CD25 and Foxp3 was measured by flow cytometry in T<sub>reg</sub> cell subgroups I (CD25<sup>int</sup>CD45RA<sup>+</sup> cells), II (CD25<sup>hi</sup>CD45RA<sup>-</sup> cells), and III (CD25<sup>int</sup>CD45RA<sup>-</sup> cells) in PBMCs from healthy controls (HC, n = 13) and RA patients (RA, n = 13). T<sub>reg</sub> cells were defined as (A) CD25<sup>+</sup>Foxp3<sup>+</sup>, (B) CD25<sup>+</sup>CD127<sup>-low</sup>, or (C) CD25<sup>+</sup>CD127<sup>-low</sup>Foxp3<sup>+</sup>. Statistical differences were calculated by Mann-Whitney test.

**Table S1. Characteristics of Controls and RA subjects**

| Variables                      | Controls<br>(N = 13) | RA subjects<br>(N = 13) | Unit                            |
|--------------------------------|----------------------|-------------------------|---------------------------------|
| Gender                         | 9 (69.2 %)           | 9 (69.2 %)              | Female n (%)                    |
| Age                            | 43 (26-70)           | 52 (22-78)              | Median yr (range <sup>1</sup> ) |
| Body-mass index <sup>2</sup>   | 22.4 (19.4-28.1)     | 20.2 (17.7-31.6)        | Median (range <sup>1</sup> )    |
| Disease activity (DAS28 score) | na <sup>3</sup>      | 2.7 (0.5-4.5)           | Median (range <sup>1</sup> )    |
| Remission (< 2.6)              |                      | 6 (46.2)                | N (%)                           |
| Mild (2.6-3.2)                 |                      | 2 (15.4)                | N (%)                           |
| Moderate (3.2-5.1)             |                      | 5 (38.4)                | N (%)                           |
| Severe (>5.1)                  |                      | 0 (0)                   | N (%)                           |

<sup>1</sup> Minimum to maximum

<sup>2</sup> Body-mass index is the weight in kilograms divided by the square of the height in meters.

<sup>3</sup> not applicable
